# Supplementary material for: Dynamic impact response of lithium-ion batteries, constitutive properties and failure model
Source: RSC Adv. 2019 Jan 15;9(5):2464–73. doi: 10.1039/c8ra08898e (PMC9059972; doi:10.1039/c8ra08898e)
Supplement: RA-009-C8RA08898E-s001 [file RA-009-C8RA08898E-s001.pdf]

**Supporting Information for ‘Dynamic Impact Response of Lithium-Ion Batteries,  
Constitutive Properties and Failure Model’**

Golriz Kermani <sup>a,c</sup>

Elham Sahraei <sup>a,b,c</sup>

<sup>a</sup> Electric Vehicle Safety Lab (EVSL), Department of Mechanical Engineering, Temple University, Philadelphia, PA 19122, United States

<sup>b</sup> Department of Mechanical Engineering, Massachusetts Institute of Technology, Cambridge, MA 02139, United States

<sup>c</sup> George Mason University, Fairfax, VA 22030, United States

### Pouch Cells

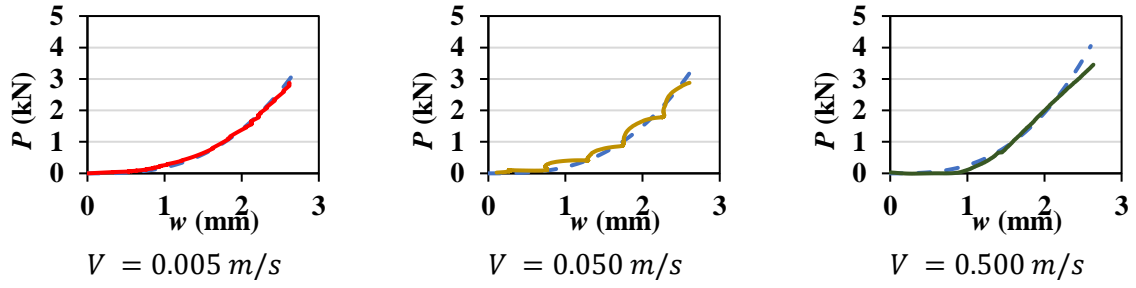

### Elliptical Cells

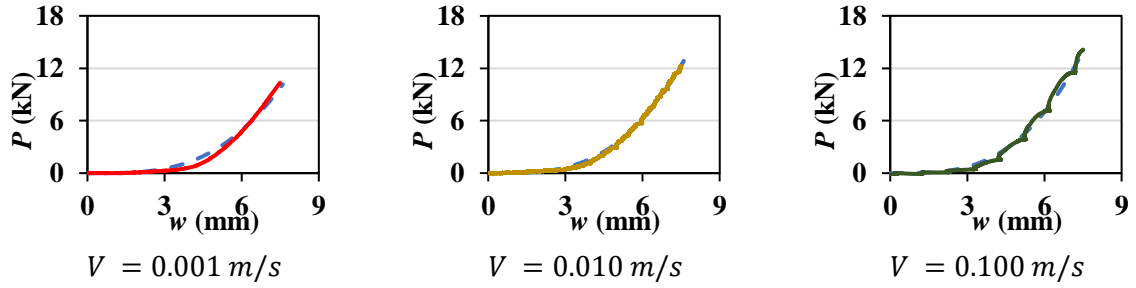

Figure S1- Analytical (dashed lines) vs. experimental (solid lines) load-displacement response of pouch cells (Top) and elliptical cells (Bottom) at different crosshead velocities

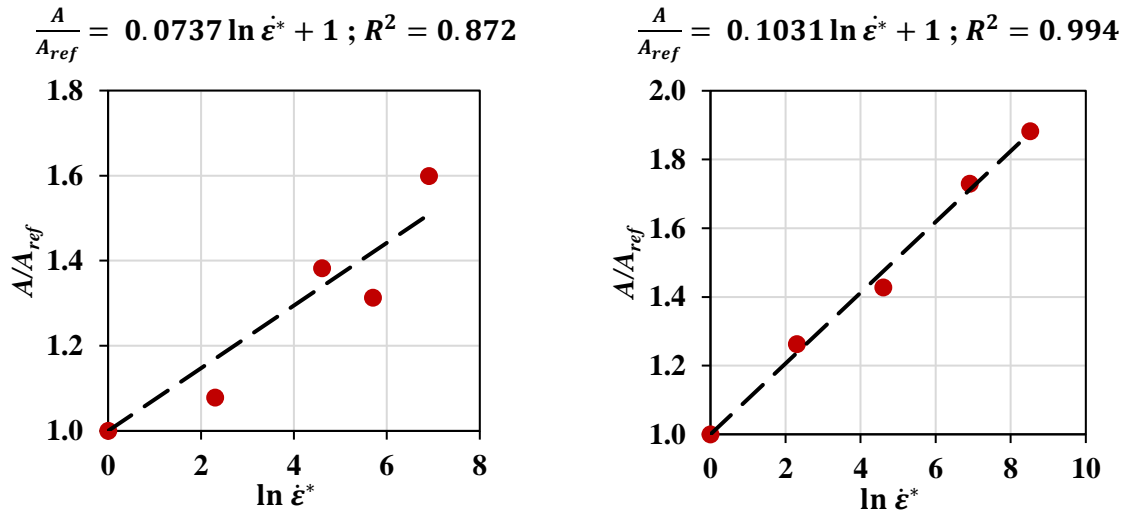

Figure S2. Linear relationship between the normalized fit coefficients ( $A/A_{ref}$ ) and  $\ln \dot{\epsilon}^*$  in a) pouch and b) elliptical cells.

$$\varepsilon_f = -0.003 \ln \dot{\varepsilon}^* + 0.075 ; R^2 = 0.996$$

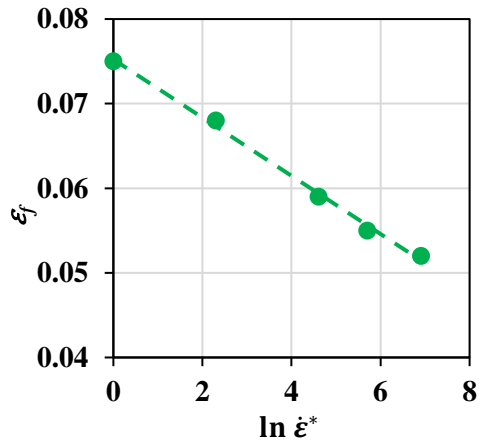

a) Pouch Cell, Mesh 1.2 mm

$$\varepsilon_f = -0.004 \ln \dot{\varepsilon}^* + 0.109 ; R^2 = 0.978$$

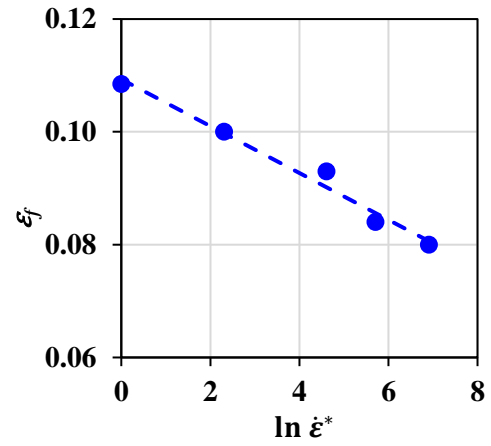

b) Pouch Cell, Mesh 2.0 mm

$$\varepsilon_f = -0.004 \ln \dot{\varepsilon}^* + 0.116 ; R^2 = 0.970$$

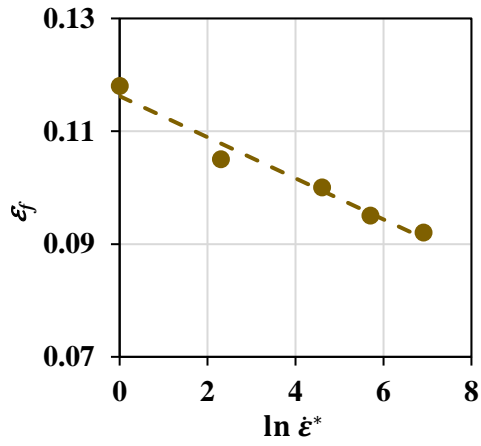

c) Pouch Cell, Mesh 4.0 mm

Figure S3. A negative linear relationship was found between  $\varepsilon_f$  and  $\ln \dot{\varepsilon}^*$  in pouch cells for all mesh sizes studied (a, b, and c).
